# Supplementary material
Source: PubMed Central journal article supplement (PMC7350285)
Supplement: NIHMS1598372-supplement-1.pdf [file NIHMS1598372-supplement-1.pdf]

## Sanchez et al., Supplementary Figures

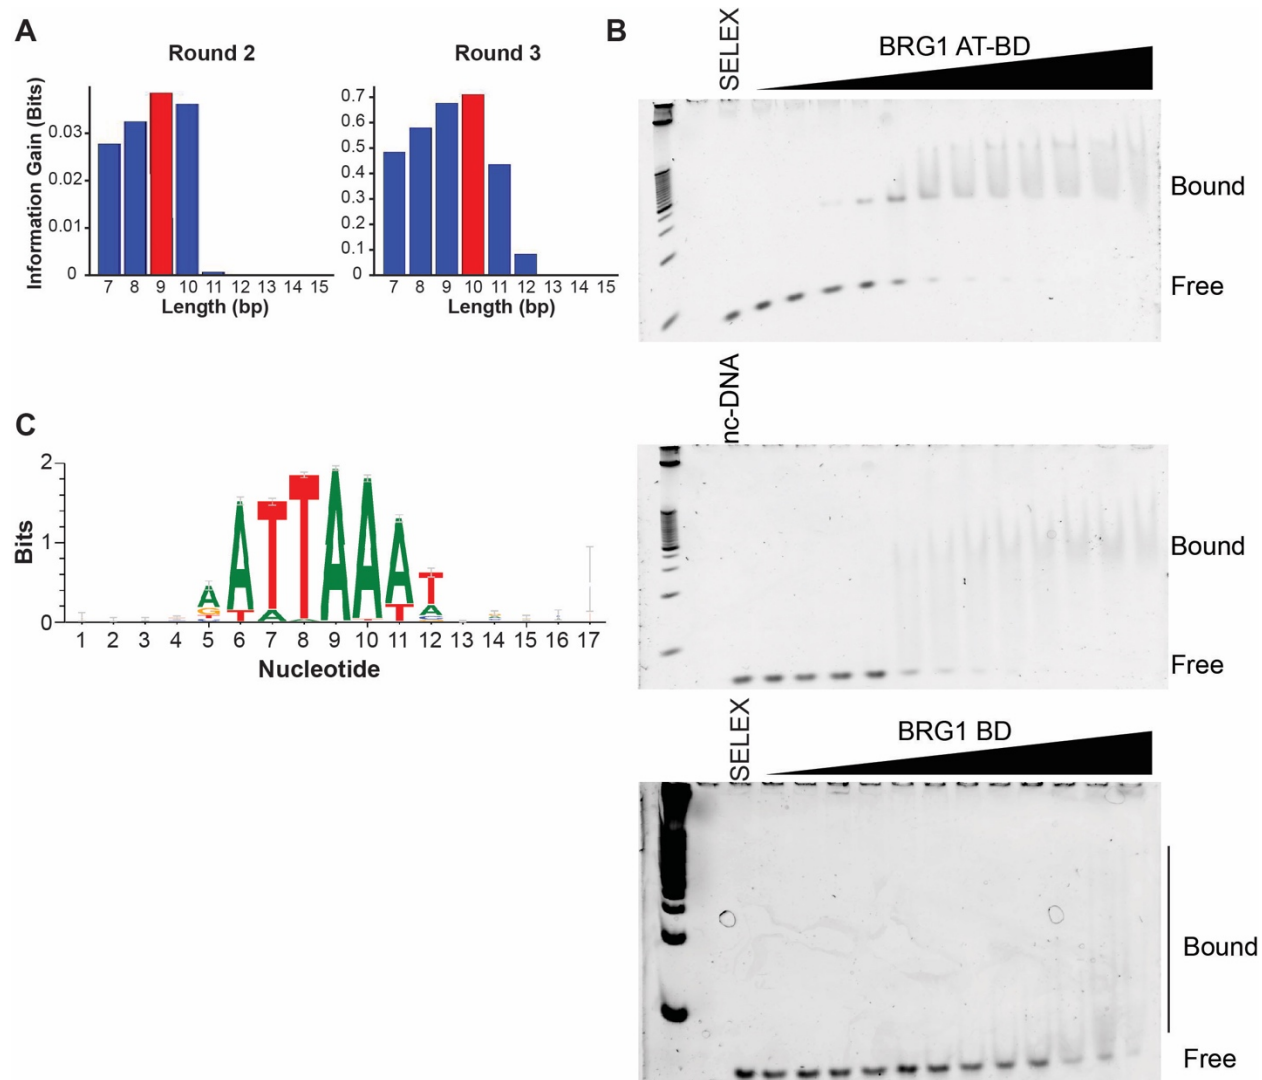

**Figure S1. SELEX-seq defines the length and composition of the AT-BD binding site.** (A) SELEX-seq was performed for a total of 3 rounds. Information gain analysis (SELEX,R/Bioconductor) shows maximal information gain is achieved with a 9bp long site after two rounds (left). After 3 rounds maximal information gain is achieved with a binding site length of 10bp. (B) Electromobility shift assays (EMSA) assessing the affinity of AT-BD for the consensus motif (SELEX-DNA, top) defined by the SelexGLM PSAM (Figure 1C) and a non-consensus binding site (nc-DNA, middle) or for the BD alone for the SELEX-DNA. (C) Position weight matrix (PWM) for the 2000 most highly enriched sequences after Round 3 of SELEX-seq. A core 9bp binding site (Nucleotides 4-12) as well as some downstream preference (Nucleotides 14-15) is evident that closely resembles the 10bp Position Specific Affinity Matrix (PSAM) calculated by SelexGLM based on enrichment from Round 2 to Round 3 (Figure 1C).

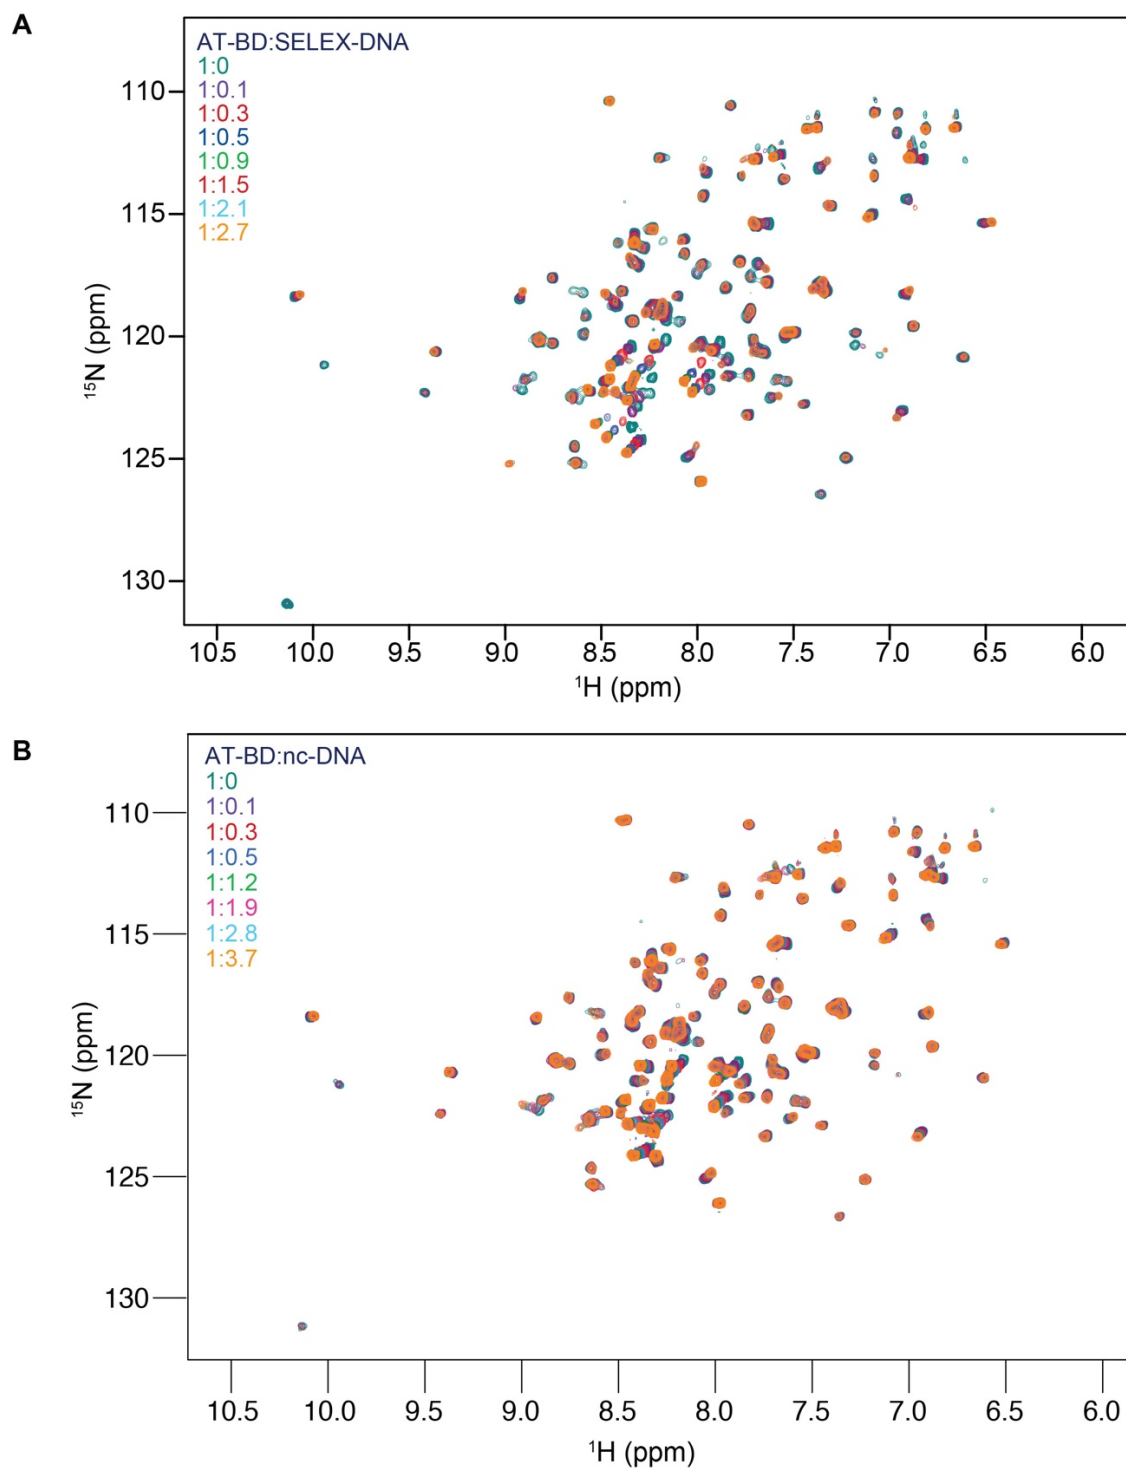

**Figure S2. NMR titrations with SELEX-DNA or nc-DNA. (A)** Overlay of  $^1\text{H},^{15}\text{N}$ -HSQC spectra  $^{15}\text{N}$ -labeled AT-BD upon titration of unlabeled double stranded **(A)** SELEX-DNA or **(B)** nc-DNA. and color coded according to the ratios indicated. Molar ratios are color coded according legend.

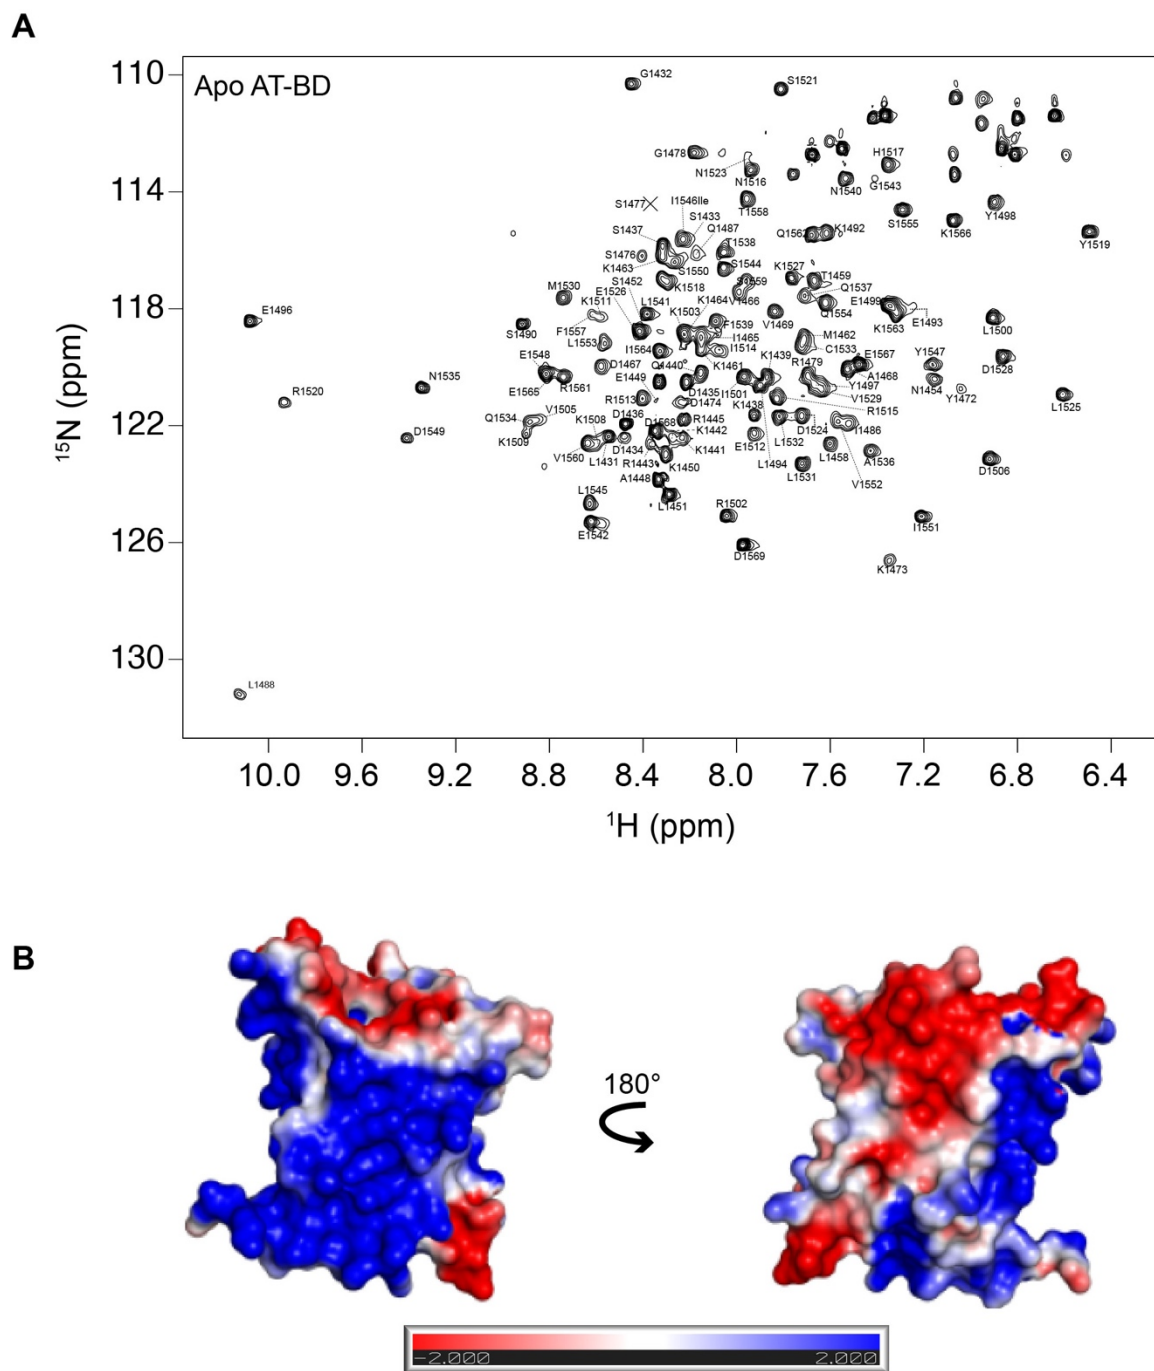

**Figure S3. Backbone assignment of the BRG1 ATBD. (A)** Final assignment for the backbone amide protons of AT-BD. The construct contains 141 residues, 9 of which are prolines. Thus, assuming fast exchange, 132 resonances would be expected. Of the 117 peaks observed 113 were successfully assigned. **(B)** Electrostatic surface potential for the BD (PDB ID 3UVD) as calculated by APBS in Pymol, colored according to legend where blue represents positive potential and red represents negative potential.

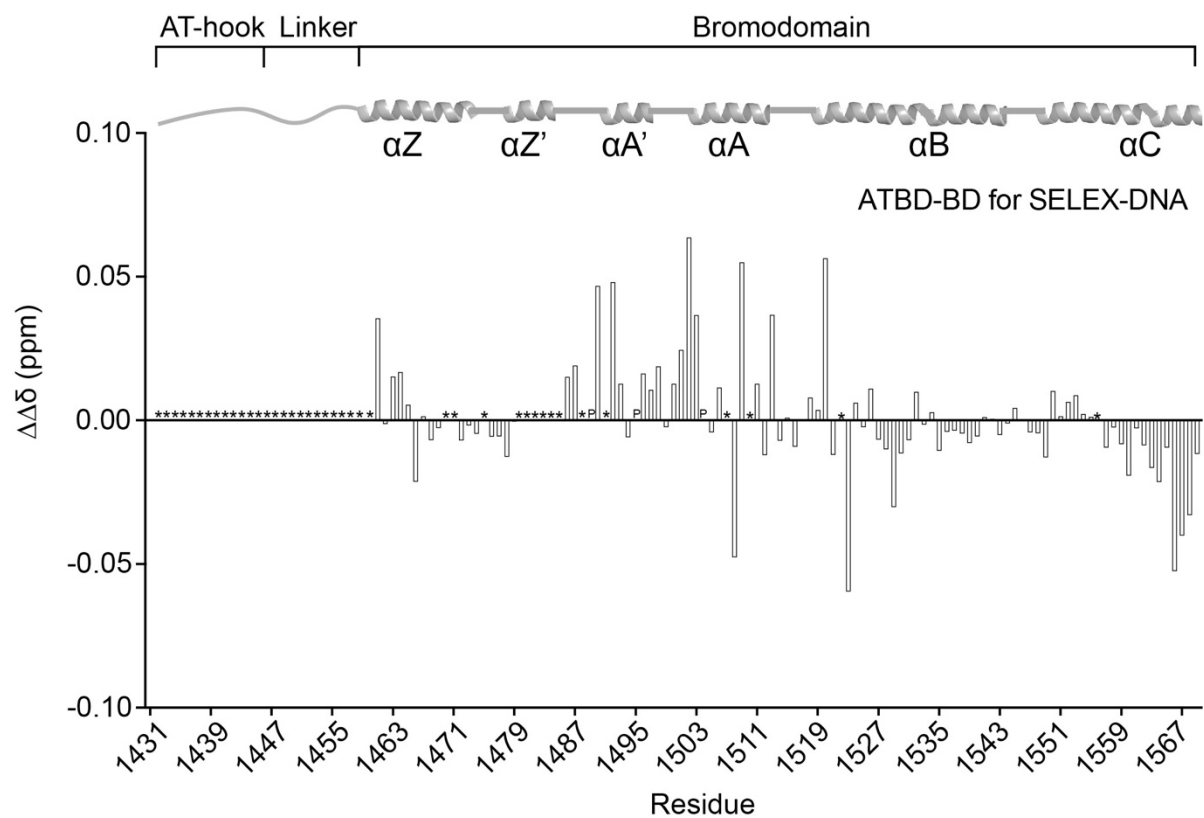

**Figure S4. The AT-BD has greater CSPs upon binding DNA than BD.** Differences in the magnitude of CSPs ( $\Delta\Delta\delta$ ) between bound states of the AT-BD and BD upon binding to SELEX-DNA as a function of residue. The \* denotes a missing assignment (including the AT-hook in this case). The “P” denotes a proline residue.

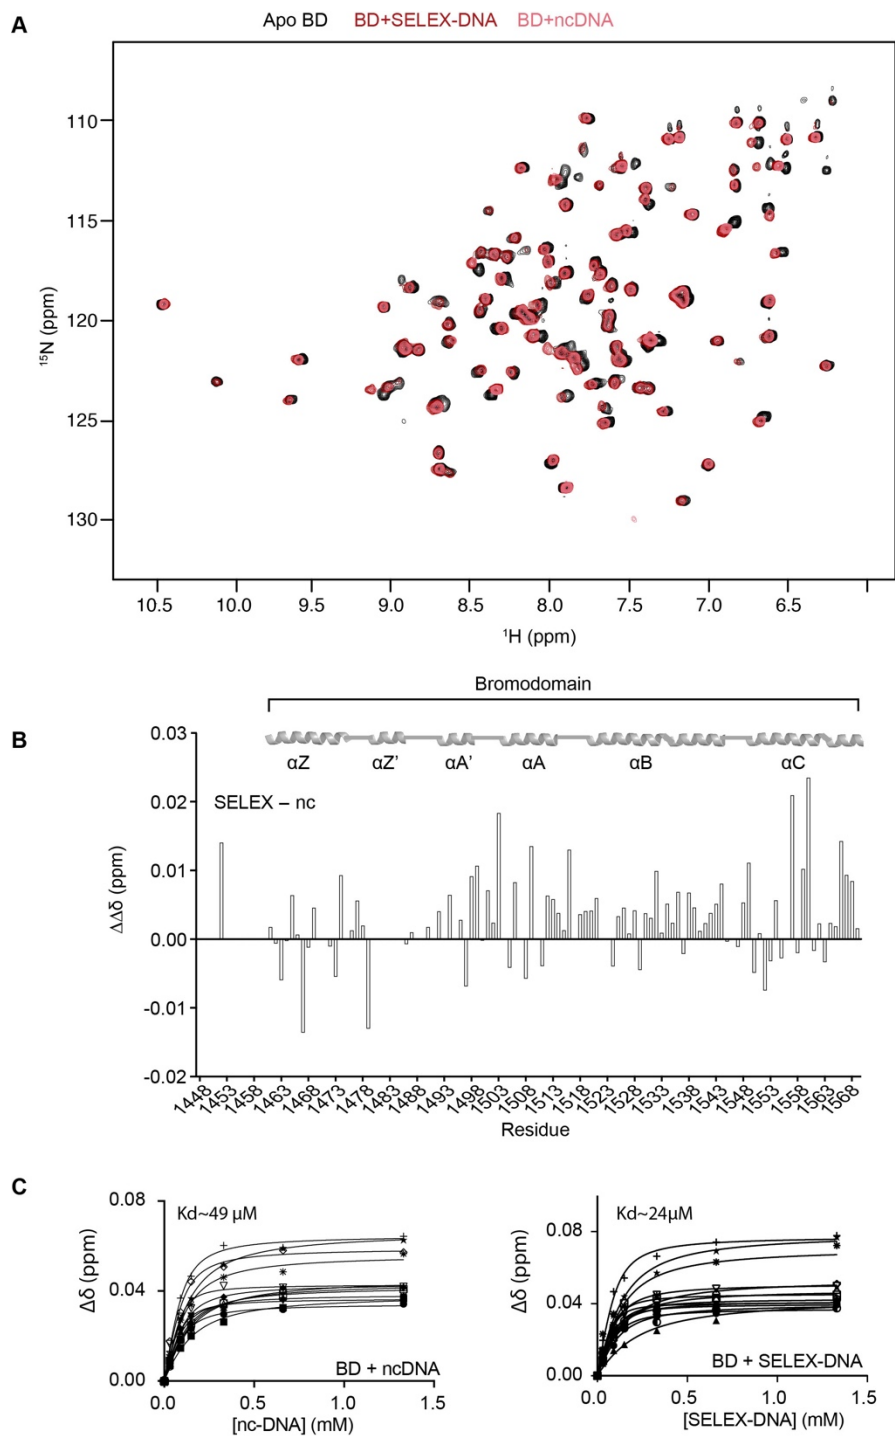

**Figure S5. The BD alone forms a more stable complex with SELEX-DNA than nc-DNA. (A)** Overlay of  $^1\text{H}$ ,  $^{15}\text{N}$ -HSQC spectra of  $^{15}\text{N}$ -BD (apo) saturated with SELEX-DNA (red) or nc-DNA (salmon). **(B)** Differences in the magnitude of CSPs ( $\Delta\Delta\delta$ ) between bound states (SELEX-DNA minus nc-DNA) as a function of residue. **(C)** Representative curves and calculated dissociation constant ( $K_d$ ) determined from the normalized chemical shift perturbations as a function of DNA concentration accounting for ligand depletion.

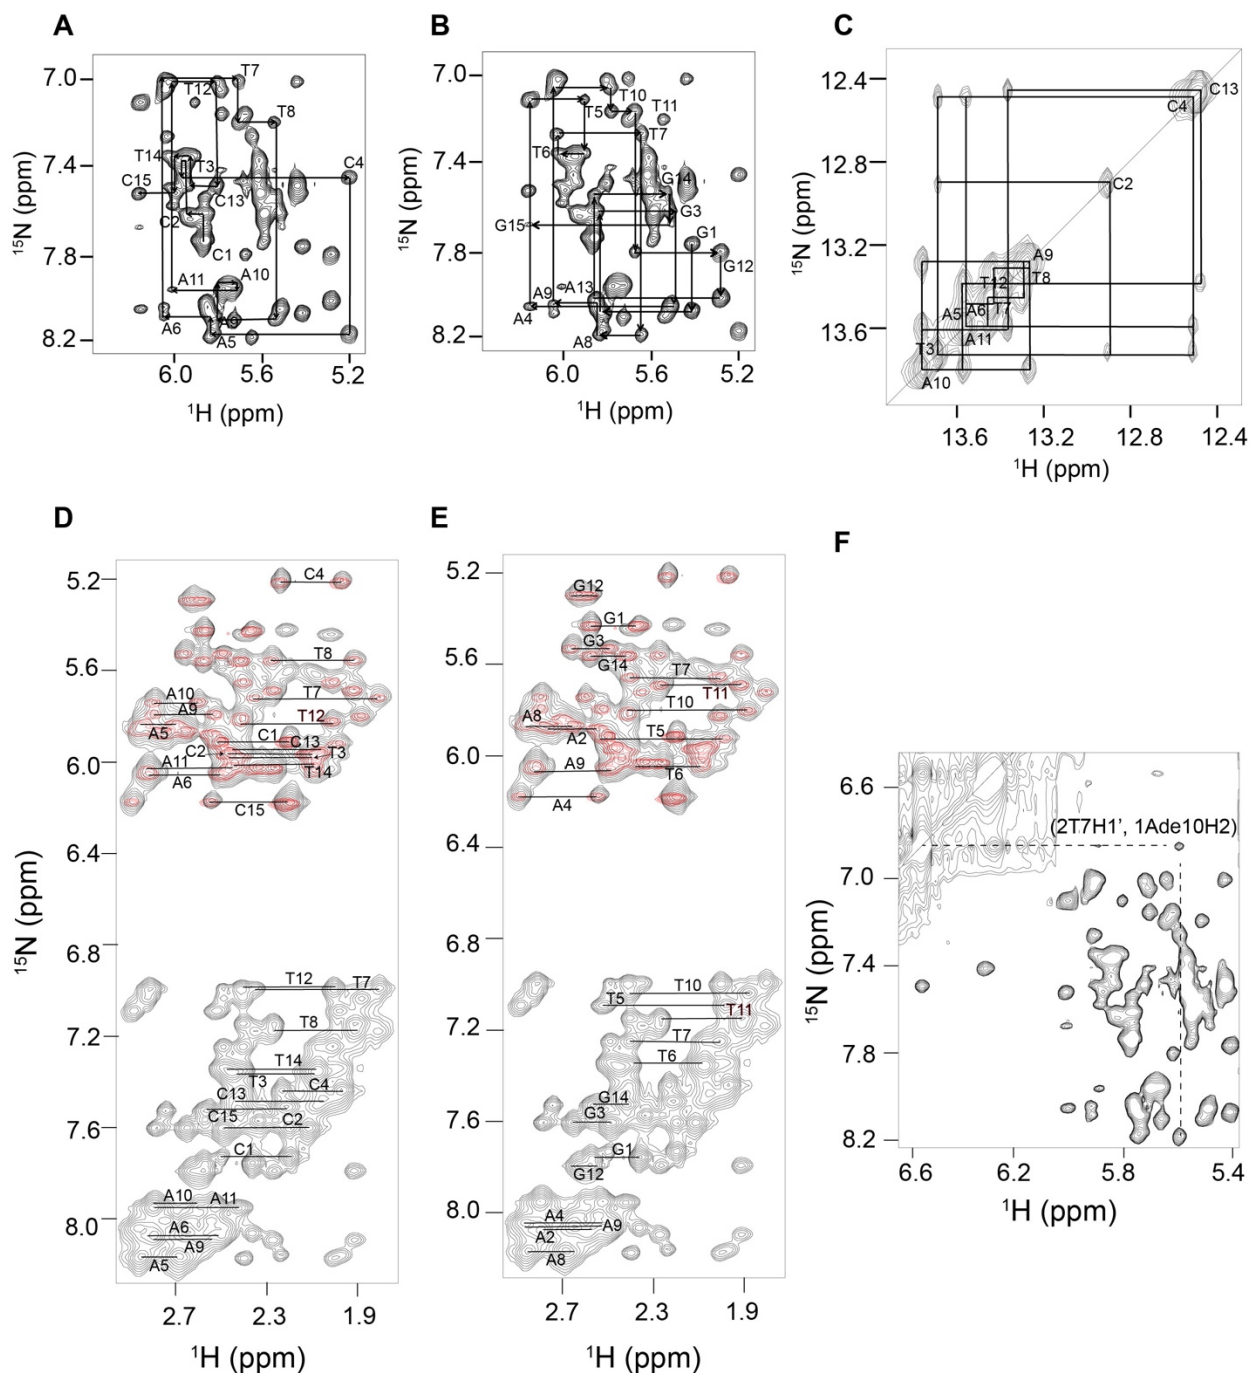

**Figure S6. Assignment of double-stranded SELEX-DNA. (A)** NOESY walk of the forward strand (H6,H8/H1' area). **(B)** NOESY walk of the reverse strand. **(C)** Imino proton assignments. **(D)** Homonuclear NOESY spectrum (black) showing the assignments of the NOEs between H2', H2'' and H6/H8 protons (bottom) and NOEs between H2', H2'' and H1' protons (top) for the forward strand and **(E)** for the reverse strand. TOCSY spectra (red) were also used in assignments. **(F)** Inter-strand cross-peak NOE observed due to the narrowing of the minor groove in DNA.

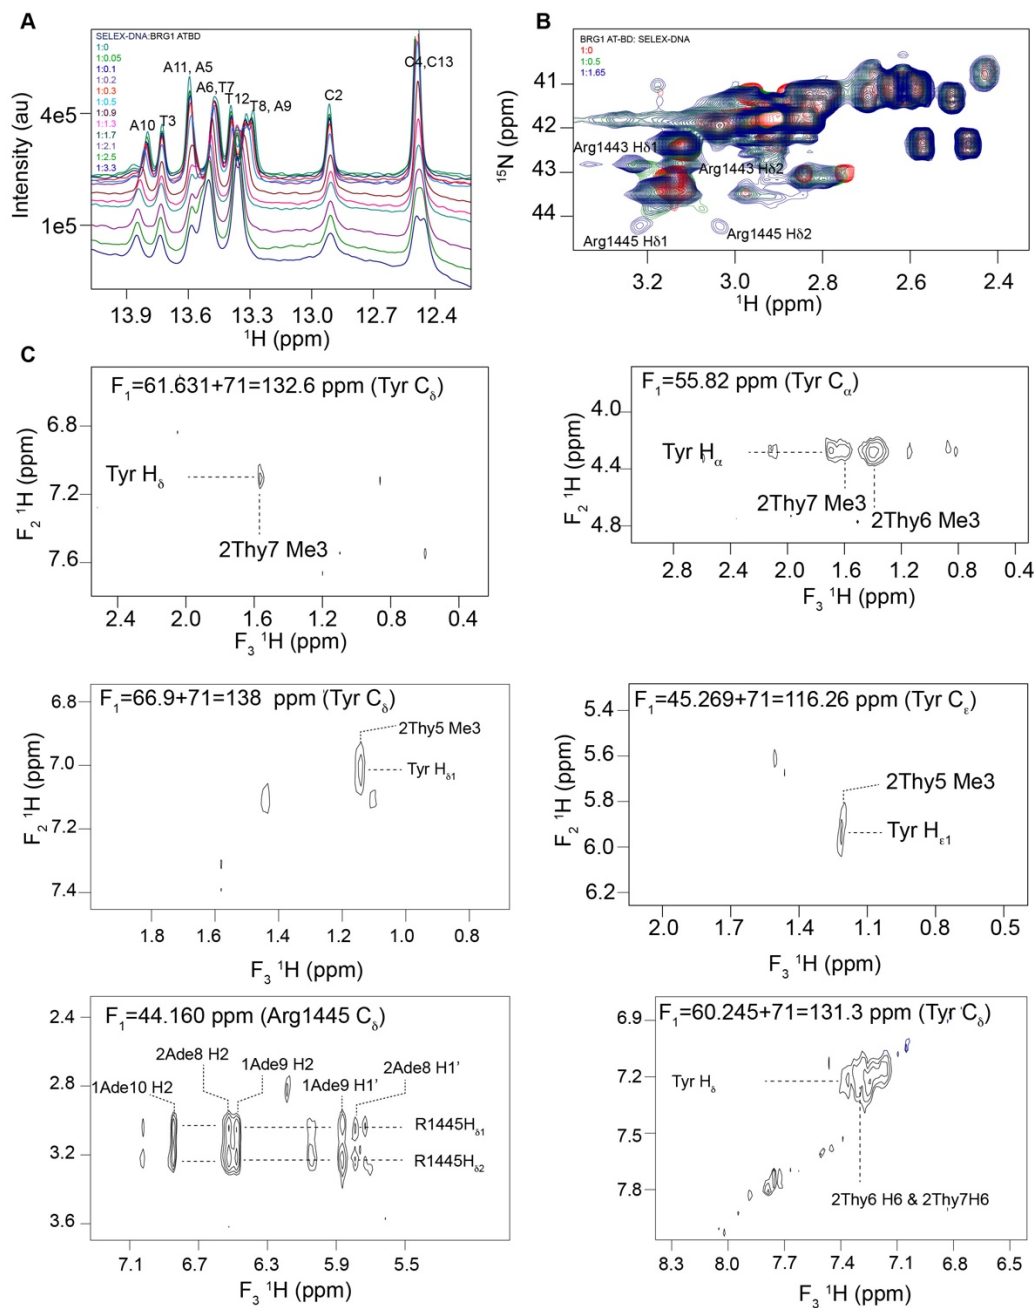

**Figure S7. AT-BD interaction with SELEX-DNA. (A)** Overlay of sequential 1D imino spectra of unlabeled double stranded SELEX-DNA upon titration with unlabeled AT-BD. Molar ratios are color coded as indicated in the legend. **(B)** Overlay of a selected region of  $^1\text{H},^{13}\text{C}$ -HMQC spectra of  $^{13}\text{C}$ -AT-BD with unlabeled SELEX-DNA. Resonances for Arg1443 and Arg1445 split from single peaks in the apo state (red) to two peaks respectively upon saturation with SELEX-DNA (blue). **(C)** NOE crosspeaks between the AT-BD and DNA.

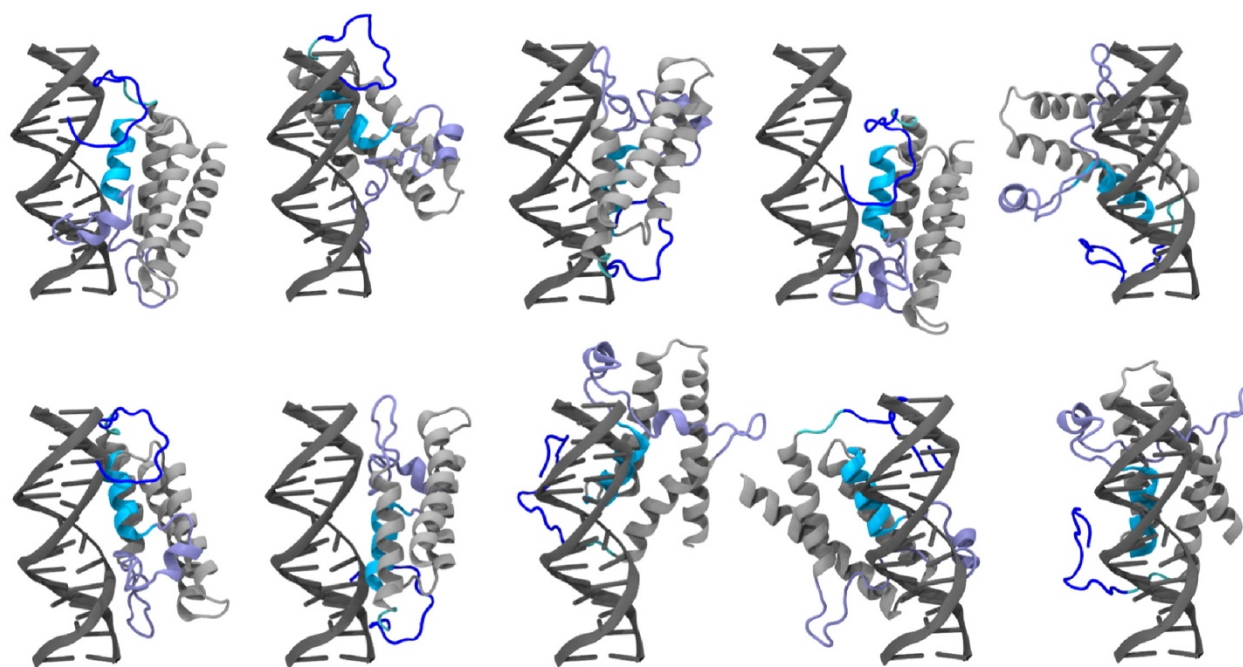

**Figure S8. HADDOCK structures.** Structures of the top ten scoring AT-BD/SELEX-DNA complexes after the main HADDOCK run with the AT-hook colored in blue,  $\alpha$ A helix in deep sky blue, the ZA loop in ice blue, and the linker in cyan. The DNA and the rest of the BD are in silver.



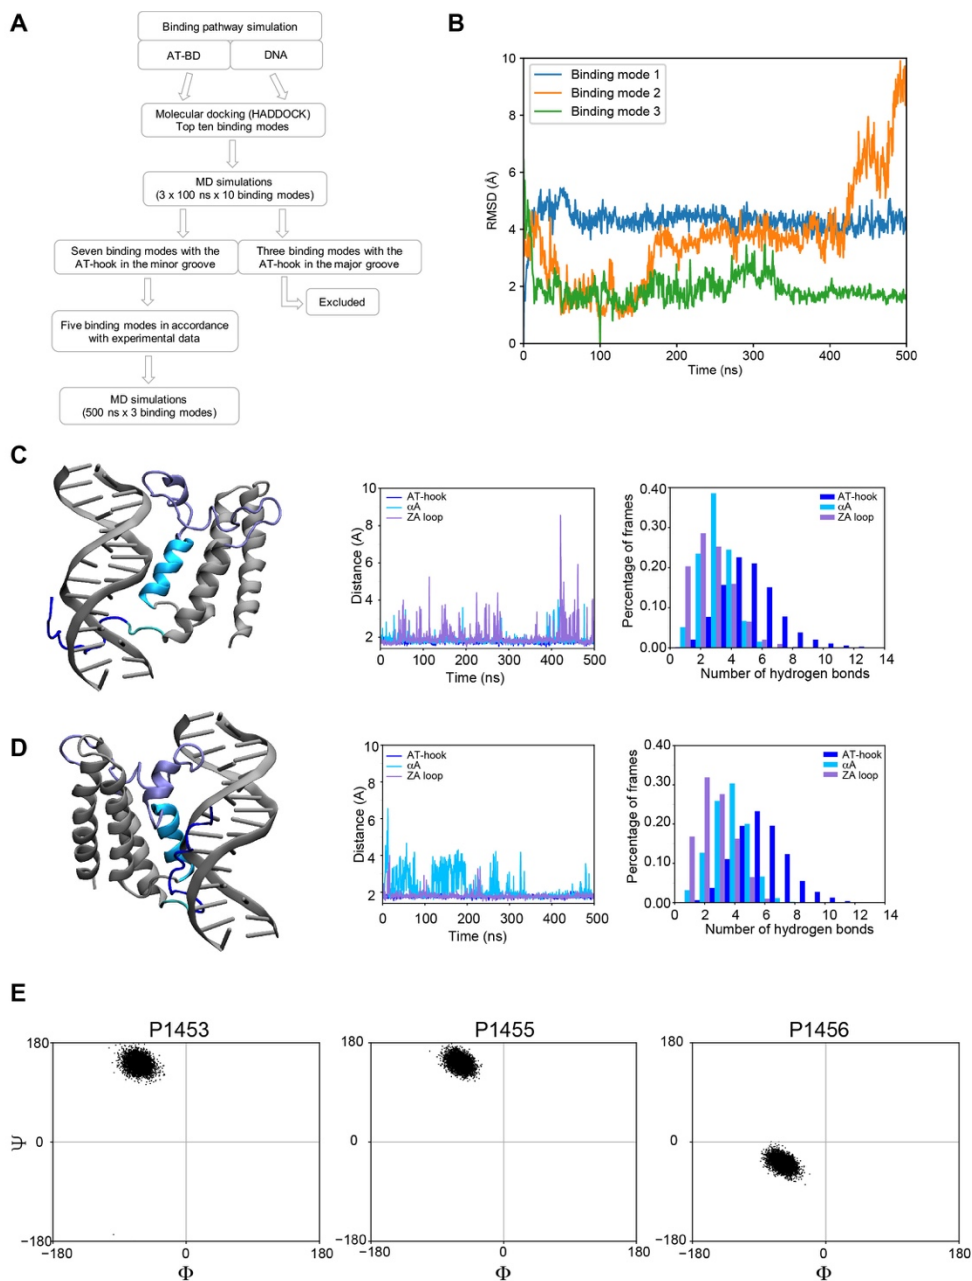

**Figure S9. Molecular model of the AT-BD/SELEX-DNA complex. (A)** Flow chart outlining the multi-step restraint-enabled refinement approach. **(B)** Root mean square deviation (RMSD) of AT-BD relative to SELEX-DNA for binding mode 1 (blue), 2 (orange), and 3 (green). **(C)** Model of AT-BD/SELEX-DNA for binding mode 2. The AT-hook is highlighted in blue, the  $\alpha$ A in deep sky blue, the ZA loop in ice blue and the linker in cyan. The DNA and the rest of the BRG1 BD are in gray. The minimum distance between the AT-BD elements and DNA over the 500ns simulation are shown (middle). The number of hydrogen bonds between AT-BD elements and SELEX-DNA in the percentage of frames during the 500 ns simulations are shown (right). **(D)** The same as (C) for binding mode 3. **(E)** Computed Ramachandran angles for the three prolines in the linker (Pro1553, Pro1555, and Pro1556) over the course of the simulation.

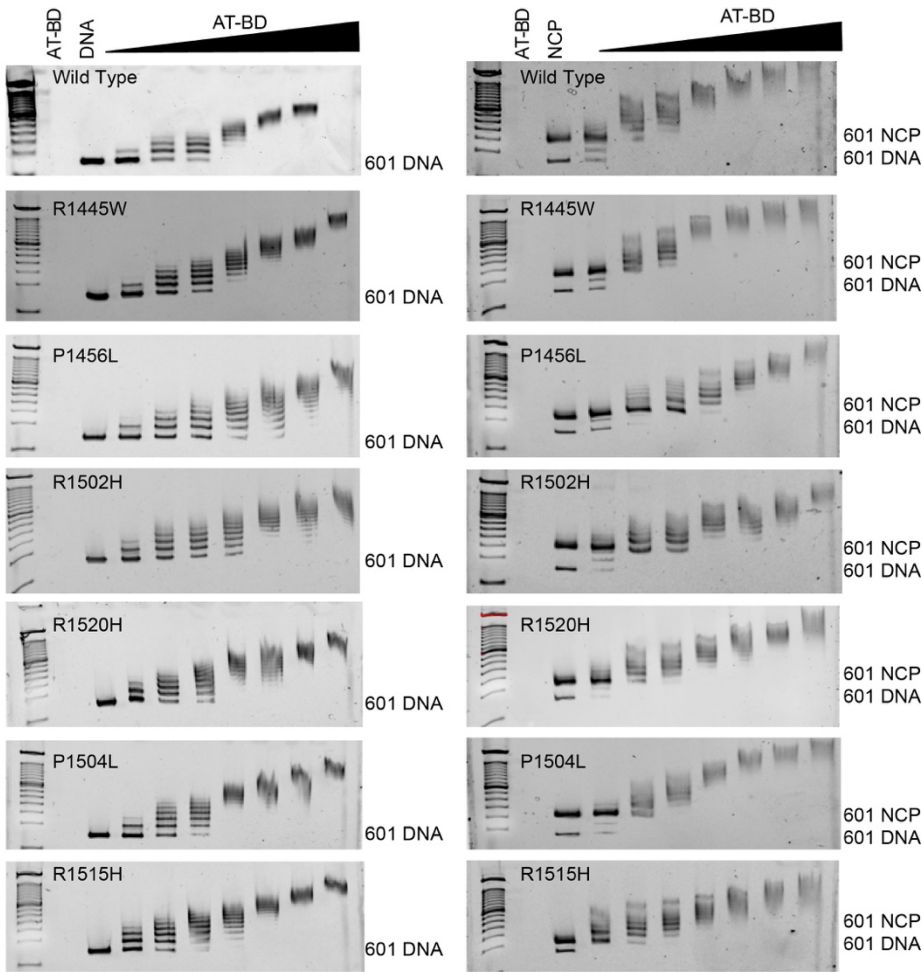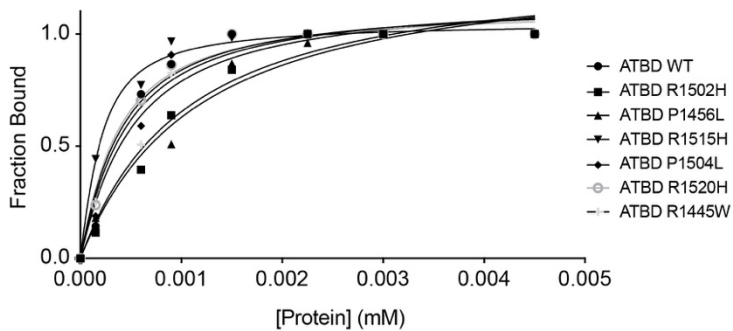

**Figure S10. Interaction of AT-BD cancer mutants with DNA and NCPs.** The interaction of wild-type (WT) AT-BD and AT-BD containing single cancer mutations were tested via EMSA. The 147bp Widom 601 DNA naked (left) or formed into nucleosome core particles (NCPs, right) was visualized on a native gel in the presence of increasing concentrations of WT AT-BD or AT-BD containing a single point mutation. Controls of protein with no DNA (AT-BD) and DNA/NCP with no AT-BD (DNA/NCP) were also run. DNA was visualized with Ethidium Bromide. The fraction bound was calculated based on analysis of the remaining unbound DNA and plotted as a function of protein concentration.

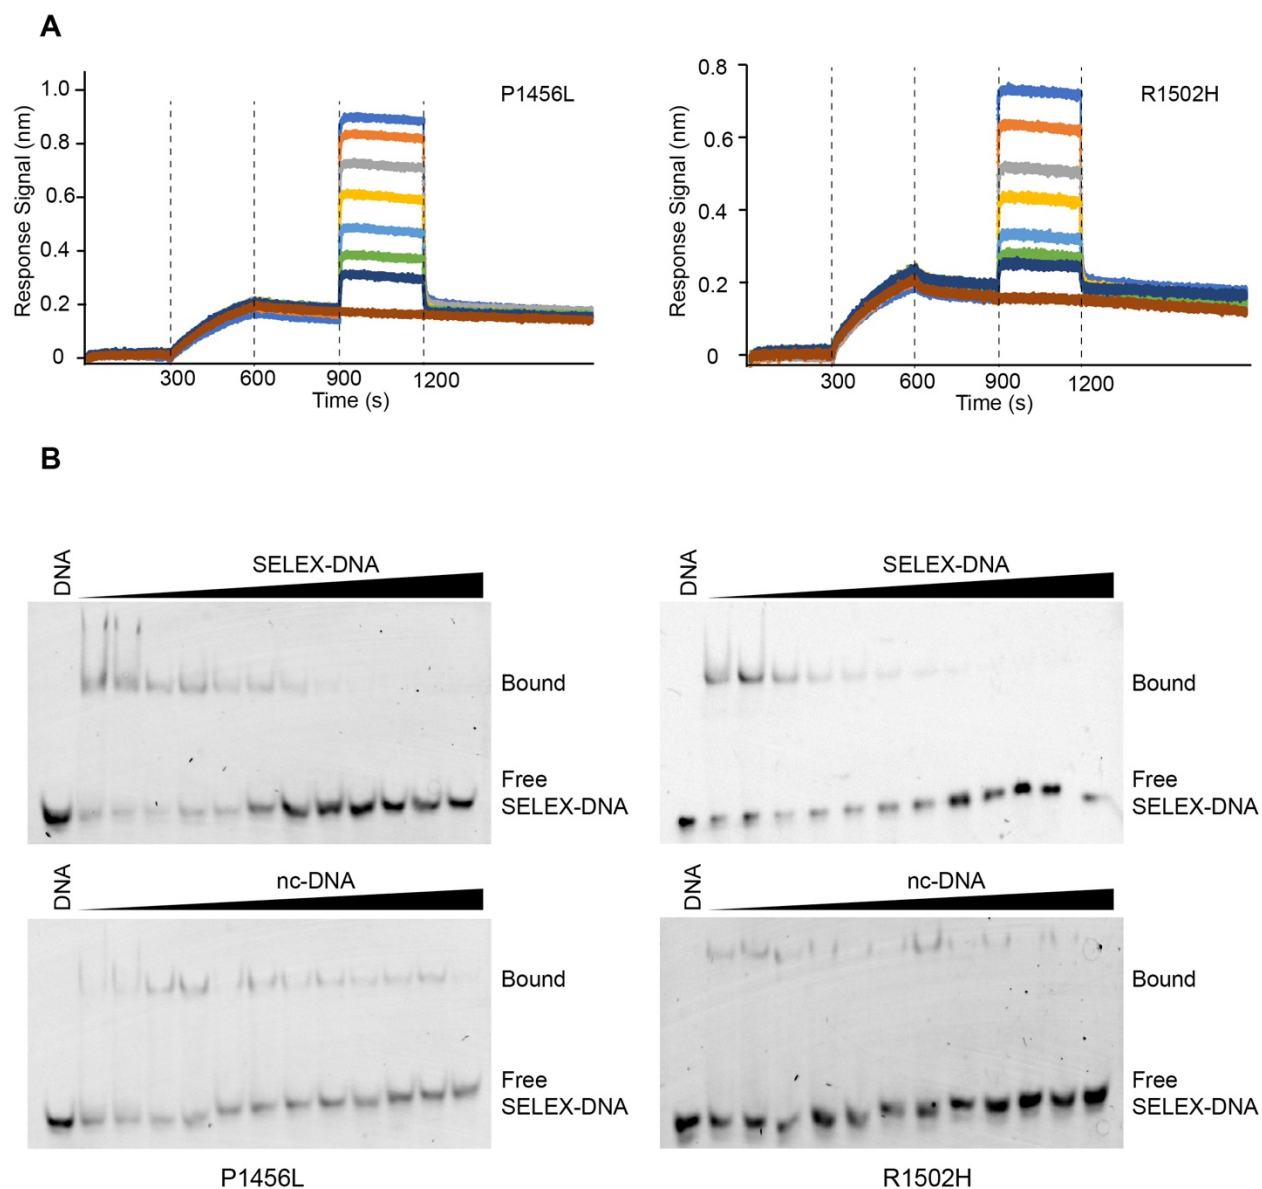

**Figure S11. Mutant AT-BD DNA binding affinity and selectivity (A)** Representative raw BLI curves for the P1456L and R1502H mutant AT-BD in binding to SELEX-DNA. **(B)** Competitive EMSAs of AT-BD P1456L (left) and R1502H (right). The complex of AT-BD and Cy5-labeled SELEX-DNA (bound) was competed against unlabeled SELEX-DNA (top) or nc-DNA (bottom).

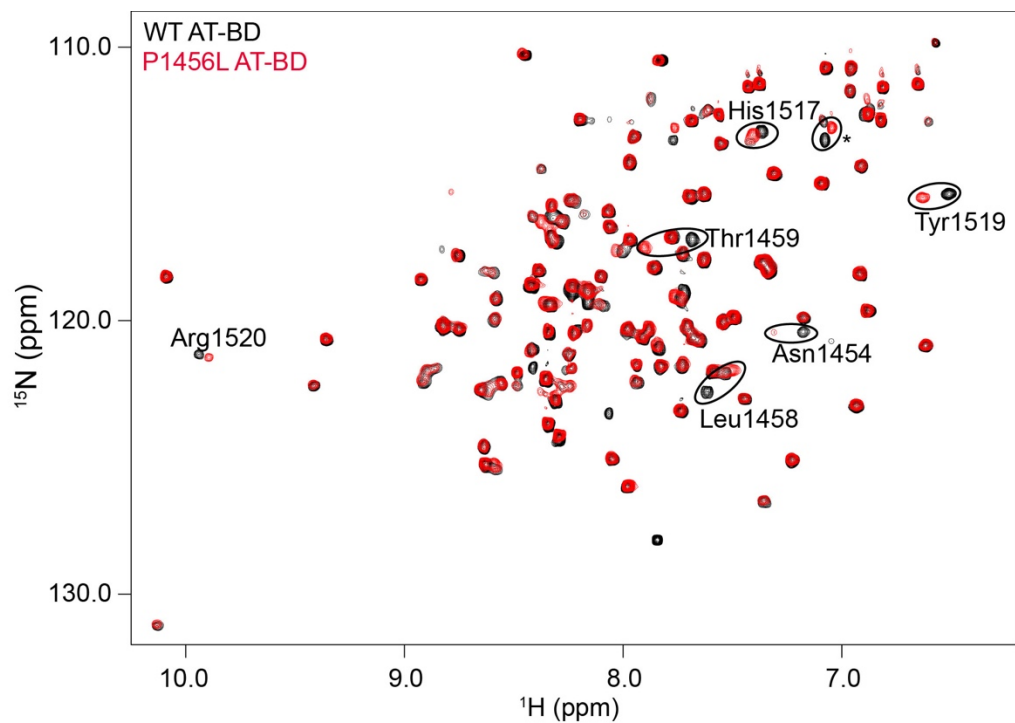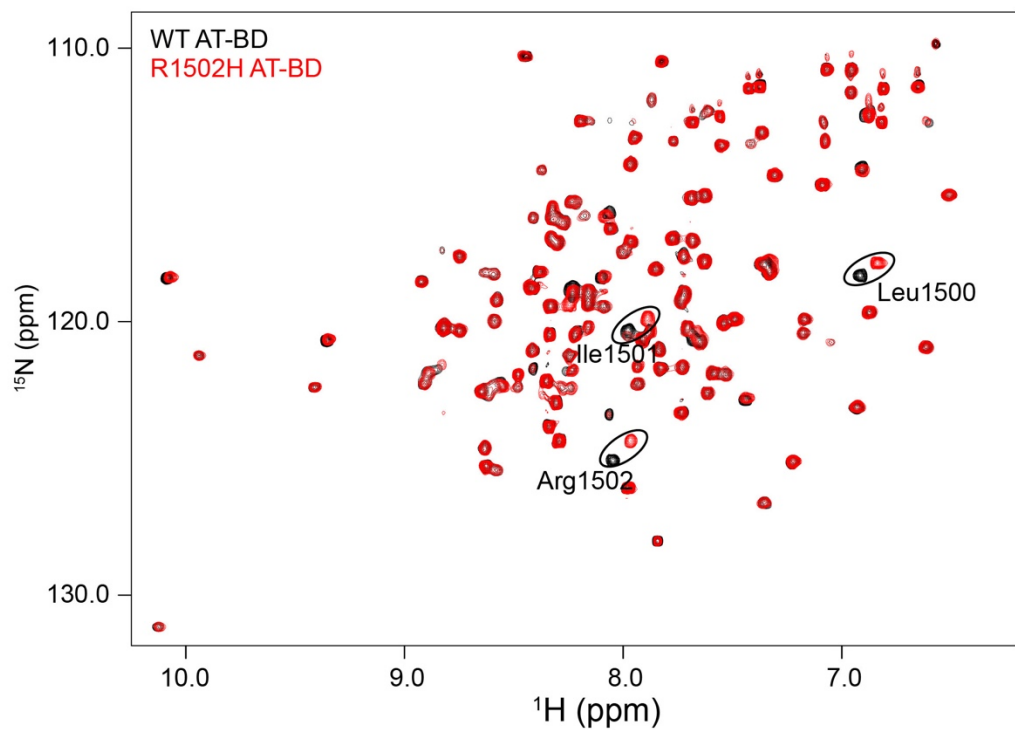

**Figure S12. Mutant protein folds.** Overlay of  $^1\text{H}$ ,  $^{15}\text{N}$ -HSQC spectra of the apo states of WT AT-BD (black) and mutant (red) for P1456L (top) or R1502H (bottom). Residues that shift substantially are circled and labelled.

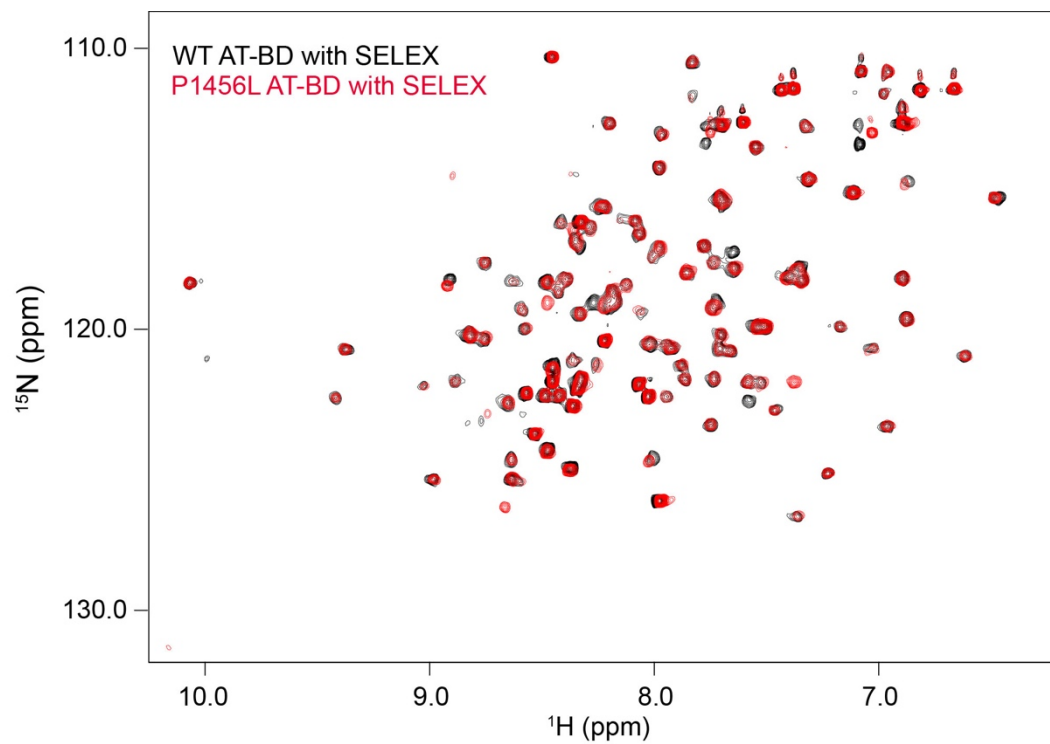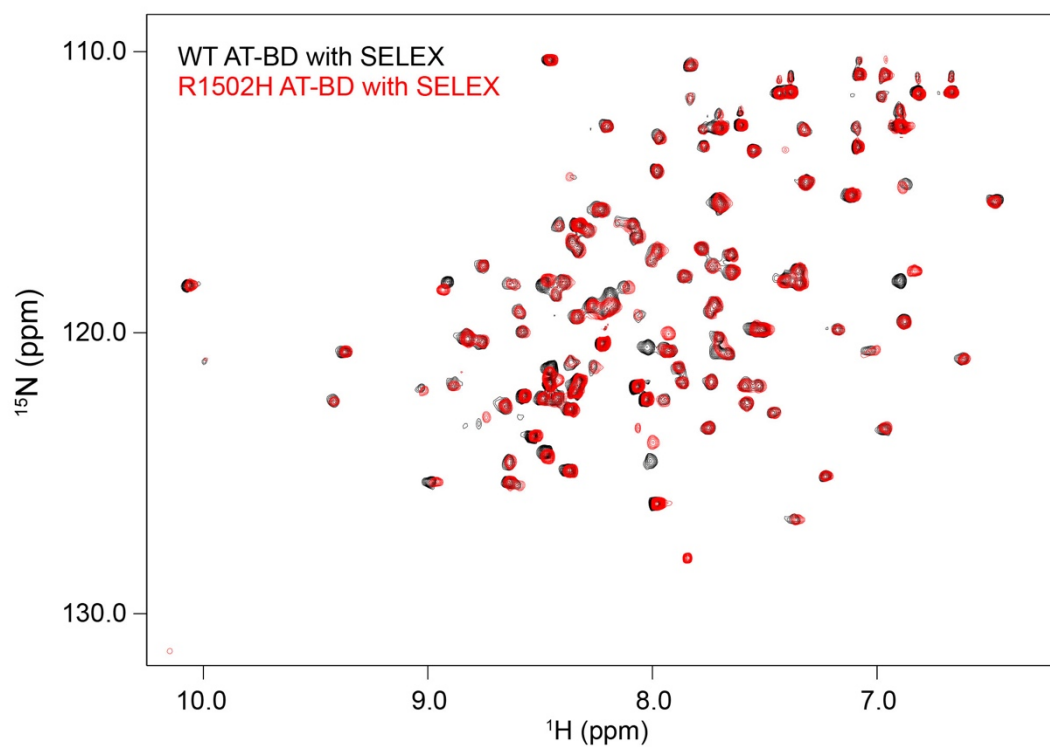

**Figure S13. Mutant protein SELEX-DNA binding.** Overlay of  $^1\text{H}$ ,  $^{15}\text{N}$ -HSQC spectra of the SELEX-bound states of WT AT-BD (black) and mutant (red) for P1456L (top) or R1502H (bottom).

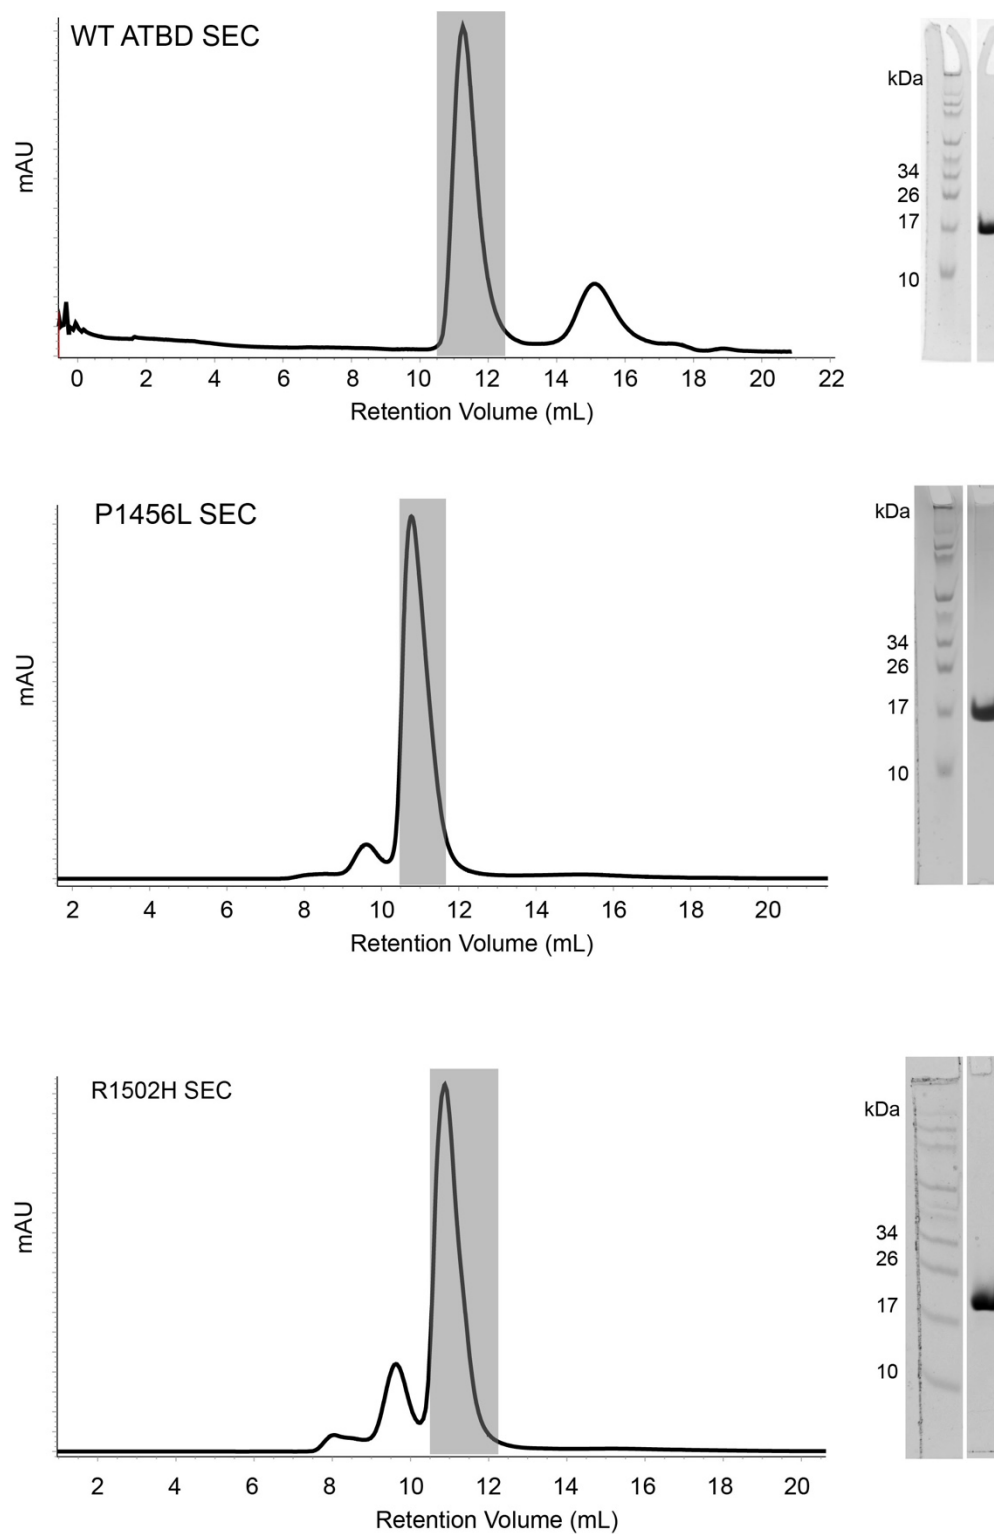

**Figure S14. Protein purification.** Size exclusion chromatography (SEC) chromatograms for WT (top), P1456L (middle), and R1502H (bottom). The fractions that were pooled are shaded gray and SDS PAGE analysis of this purified sample is shown to the right.
